# Supplementary material
Source: Springer Nature journal article supplement (https://www.springermedizin.de/resource/supplementary/12902_2006_28_MOESM2_ESM.pdf/9516092)

- 1. Reliability
- 2. Ease of use
- 3. Pain during injection
- 4. Safety in use and in storage
- 5. Number of steps in preparation

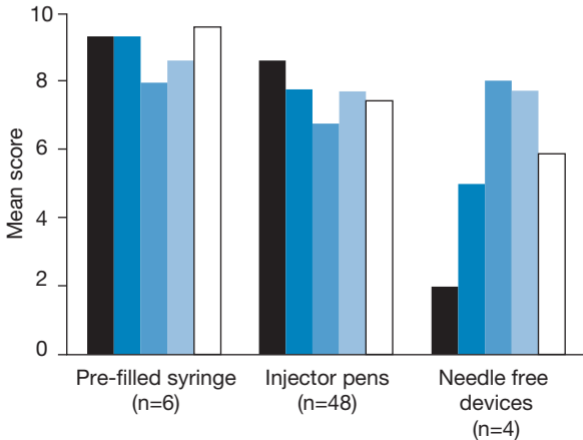

Supplement: MOESM2 [file 9516092]
